# Supplementary material for: Tuning the thermal response of 3D-printed bilayer hydrogels via architectural control using binary ethanol–water solvent systems
Source: Royal Society of Chemistry journal article supplement (doi:10.1039/d4lp00032c), 2024-01-01
Supplement: d4lp00032c1.pdf [file d4lp00032c1.pdf]

## Supporting Information

Tuning the thermal response of 3D-printed bilayer hydrogels *via* architectural control using  
binary ethanol-water solvent systems

Francis Klincewicz,<sup>a‡</sup> Subhash Kalidindi,<sup>b‡</sup> and LaShanda T.J. Korley<sup>ab\*</sup>

<sup>a</sup>Department of Materials Science and Engineering, University of Delaware, Newark, DE 19716,  
USA

<sup>b</sup>Department of Chemical and Biomolecular Engineering, University of Delaware, Newark, DE  
19716, USA

‡ - Equal contribution

\*- Corresponding author

Email: lkorley@udel.edu

## 1 Analysis and Equations

### 1.1. Rhodamine B dye elution calculation

The concentration of dye in each aliquot was determined using a Cary 60 Ultraviolet-Visible (UV-Vis) spectrophotometer (Agilent Technologies, Santa Clara, CA, USA).

Equation (1) describes the change in rhodamine B dye concentration with time:<sup>1</sup>

$$\left(\frac{C}{C_0}\right) = t^{1/2} \sqrt{\frac{D}{h^2\pi}} \quad (1)$$

where  $C$  is the concentration of dye at time  $t$  in minutes;  $C_0$  is the total concentration of dye in the original sample;  $D$  is the diffusion coefficient;  $h$  is the sample thickness.  $C/C_0$  vs.  $t^{1/2}$  was plotted to determine the diffusion coefficient from the slope over one hour. The values for  $C$  and  $C_0$  as a function of time were obtained using the concentrations determined from the measured absorbance spectra obtained from UV-Vis spectroscopy. Briefly, a calibration curve of known concentrations of rhodamine B dye in deionized (DI) water was collected to correlate dye concentration with the absorbance of the 554 nm peak. Values of  $C$  were found by interpolating the calibration curve;  $C_0$  was taken as the maximum value achieved by the eluted rhodamine B dye.

### 1.2. Crosslink Density Calculation

Crosslink density was determined using Equation (2)<sup>2</sup>

$$\nu = \frac{E'}{3RT} \quad (2)$$

where  $\nu$  is the crosslink density,  $E'$  is the plateau modulus as found through DMA analysis (**Figure S3**),  $R$  is the ideal gas constant ( $8.314 \text{ J kg}^{-1} \text{ mol}^{-1}$ ), and  $T$  is an absolute temperature well into the plateau region.

### 1.3. Bilayer Modeling

The curvature of the hydrogels can be represented by the kinematic model of Timoshenko<sup>3</sup>

$$\Delta\kappa = \frac{\left(\frac{\Delta L_{active}}{L_{0,active}} - \frac{\Delta L_{passive}}{L_{0,passive}}\right) \times f(m,n)}{h} \text{ (mm}^{-1}\text{)} \quad (3)$$

where  $\Delta\kappa$  is the change in curvature and  $h$  is the total layer thickness of the active ( $h_a$ ) and passive ( $h_p$ ) layers given by  $h = h_a + h_p$ . The function  $f(m, n)$  is defined as

$$f(m, n) = \frac{6(1+m)^2}{3(1+m)^2 + (1+mn)(m^2 + \frac{1}{mn})} \quad (4)$$

where  $m$  is the ratio of the layer thicknesses ( $m = h_p/h_a$ ) and  $n$  is the ratio of the elastic moduli of the passive ( $E_p$ ) and active ( $E_a$ ) layer ( $n = E_p/E_a$ ). Calculations and model fitting were performed using MATLAB (Mathworks) software.

## 2. Experimental results

**Table S1.** Amounts of added reagents for the 3D-printing resin for each polymer and solvent content.

| Sample              | Ethanol (mL) | Water (mL) | HEA (mL) | NIPAAm (g) | MBA (g) | TPO (g) |
|---------------------|--------------|------------|----------|------------|---------|---------|
| <b>NIPAAm 100-0</b> | 10           | 0.0        | 0        | 18.4       | 0.26    | 0.60    |
| <b>NIPAAm 75-25</b> | 7.5          | 2.5        | 0        | 18.4       | 0.26    | 0.60    |
| <b>NIPAAm 50-50</b> | 5.0          | 5.0        | 0        | 18.4       | 0.26    | 0.60    |
| <b>HEA 100-0</b>    | 10           | 0.0        | 19.6     | 0          | 0.026   | 0.60    |
| <b>HEA 75-25</b>    | 7.5          | 2.5        | 19.6     | 0          | 0.026   | 0.60    |
| <b>HEA 50-50</b>    | 5.0          | 5.0        | 19.6     | 0          | 0.026   | 0.60    |

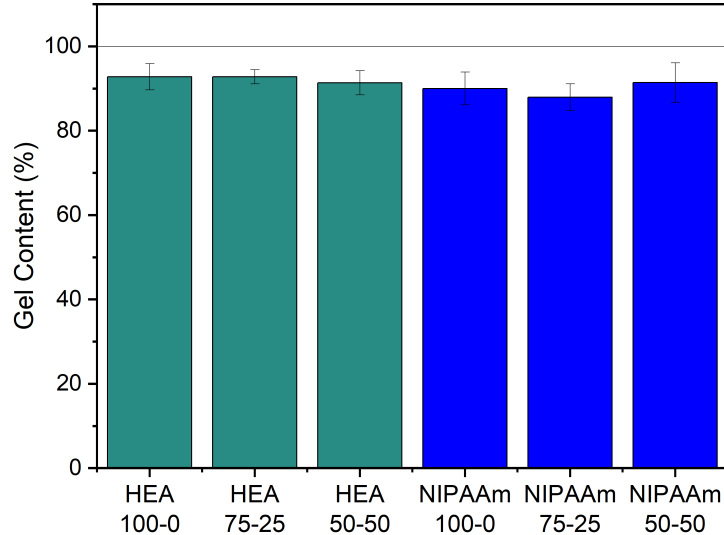

**Figure S1.** Measured gel content (%) of 3D printed pNIPAAm and pHEA gels prepared using 100-0, 75-25 and 50-50 ethanol-water binary solvent.

To measure the gel content, cylindrical pNIPAAm and pHEA gels (1 mm × 7 mm) were printed. Upon post-curing, the mass of the gels was measured ( $w_1$ ). The gels were then placed into 200-proof ethanol solution. Ethanol was refreshed (*i.e.*, the surrounding ethanol and the dissolved sol fraction were discarded, and new 200-proof ethanol added) every ~2.5 hours for four cycles. Finally, the hydrogels were dried in a vacuum oven (~30 °C) for 6 hours and weighed ( $w_2$ ). The gel content was calculated as  $\frac{w_2}{w_1} \times 100$ .

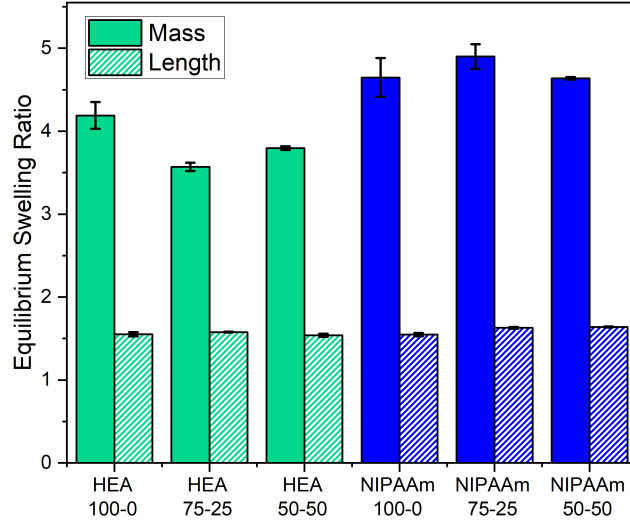

**Figure S2.** Equilibrium swelling ratio of printed pNIPAAm and pHEA 100-0, 75-25 and 50-50 hydrogels in DI water after a minimum of 24 hours.

Mass uptake is typically recorded as a measure of hydrogel swelling, but for interfacing into bilayer hydrogels, length swelling is an essential measure to ensure consistency (*e.g.*, flatness) in the bilayers.

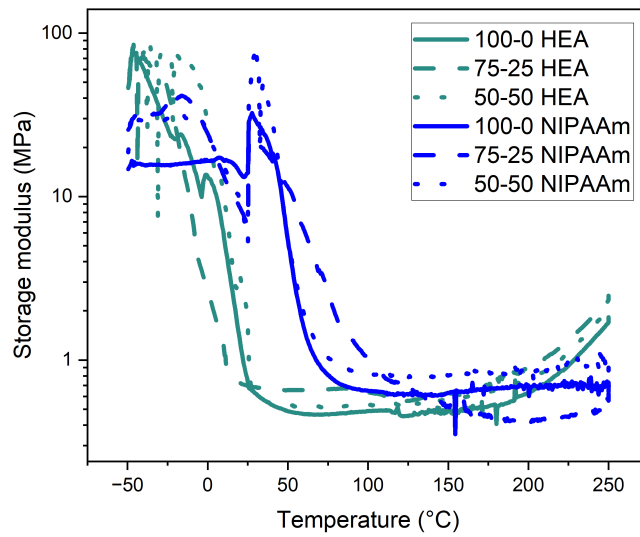

**Figure S3.** DMA of as-printed pNIPAAm and pHEA 100-0, 75-25 and 50-50 monolayer non-hydrated gels in compression mode.

While the decomposition temperature of pHEA and pNIPAAm have been reported in literature as 425 °C and 422 °C, respectively, we observed degradation at 300 °C.<sup>4,5</sup> Therefore, we limited our maximum measurement temperature to 250 °C. For our DMA analysis, first, to capture the glassy region of the networks, a temperature ramp from -50 °C to 25 °C at an amplitude of 0.05% strain was conducted. To capture the rubbery region of the networks, a second ramp from 25 °C to 250 °C at 0.05% strain was utilized. The plateau modulus was measured from the rubbery region of the networks.

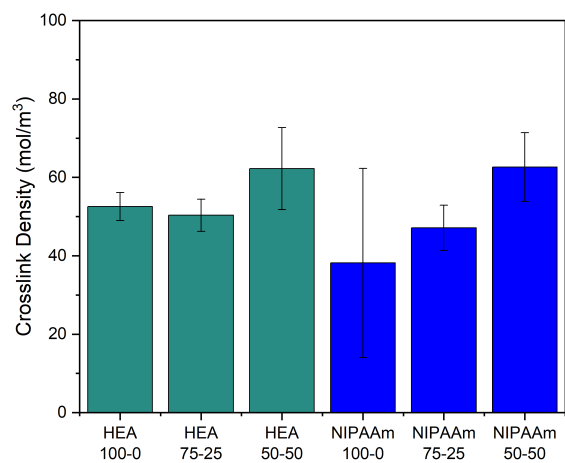

**Figure S4.** Calculated crosslink density of monolayer pHEA and pNIPAAm non-hydrated gels using Equation 2. For pHEA networks, the storage modulus at 120 °C was used to calculate the crosslink density. For the pNIPAAm networks, the storage modulus at 175 °C was used for crosslink density calculations. Error bars represent the standard deviation from three sample measurements.

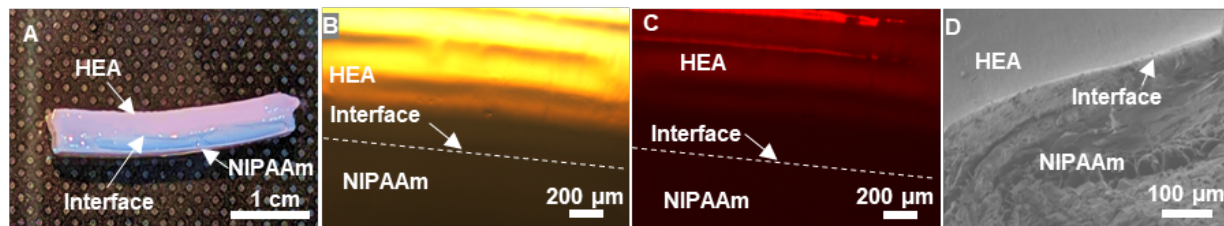

**Figure S5.** Interface and adhesion of layers in a 100-0 bilayer. A. Optical photograph of a rectangular 100-0 bilayer hydrogel with rhodamine B dyed pHEA layer and neat pNIPAAm layer. B. Darkfield micrograph of the 100-0 bilayer hydrogel showing a brighter pHEA layer and a darker pNIPAAm layer, with the interface between the two indicated by a dotted line. C. Corresponding epifluorescence optical micrograph of the bilayer hydrogel in **Figure S5B**, showing fluorescence of the pHEA layer, absence of fluorescence in the pNIPAAm layer, and the interface between the two layers indicated by a dotted line. The epifluorescence micrograph shows fluorescence only in the pHEA region, while the neat pNIPAAm layer does not fluoresce, indicating that the pHEA and pNIPAAm form discrete layers with a minimal amount of diffusion of pHEA into pNIPAAm in the bilayers during printing. D. Scanning electron microscopy (SEM) micrograph of a lyophilized 100-0 bilayer highlighting the smooth pHEA layer, porous pNIPAAm layer, and the distinct interface between the pHEA and pNIPAAm layers. The much smaller pHEA pores shown in **Figure 2** are not visible at this magnification.

To prepare 100-0 bilayer gels containing rhodamine B dye in the pHEA layer, first, 10 mL of HEA 100-0 was mixed with 200  $\mu$ L of 0.2 mM Rhodamine dye and 3D-printed to form the first layer of the bilayer gel. The NIPAAm 100-0 solution was then added to the 3D printer resin vat and printed to form bilayer hydrogels. After post-curing for 15 minutes, the bilayer gel was placed in DI water for 24 hours for equilibration before imaging using a Leica DM2500 microscope (Leica-Microsystems, Germany) to obtain **Figures S5B-C**.



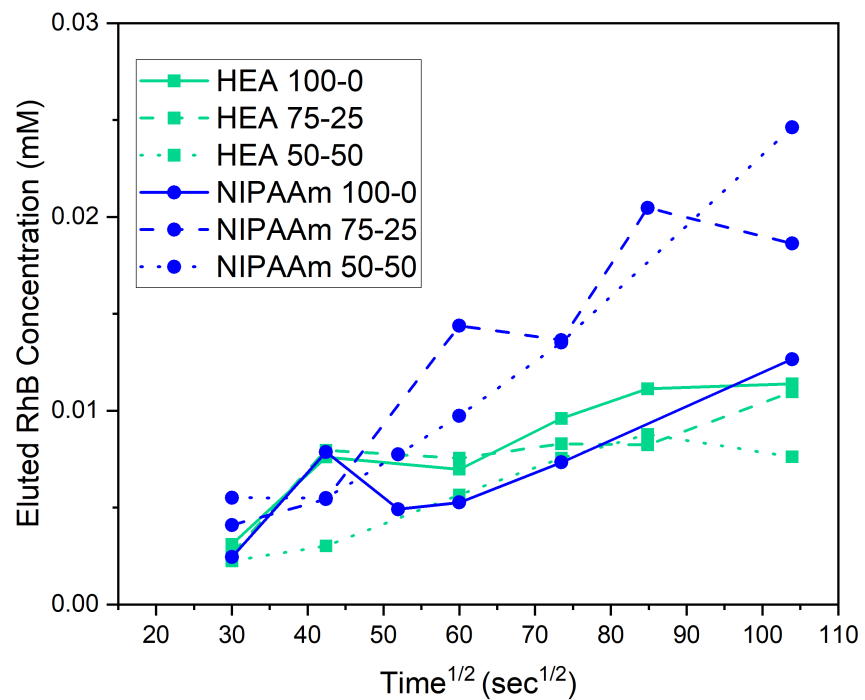

**Figure S6.** Concentrations of Rhodamine B dye eluted from pHEA and pNIPAAm hydrogels (100-0, 75-25 and 50-50 ethanol-water) over one hour.

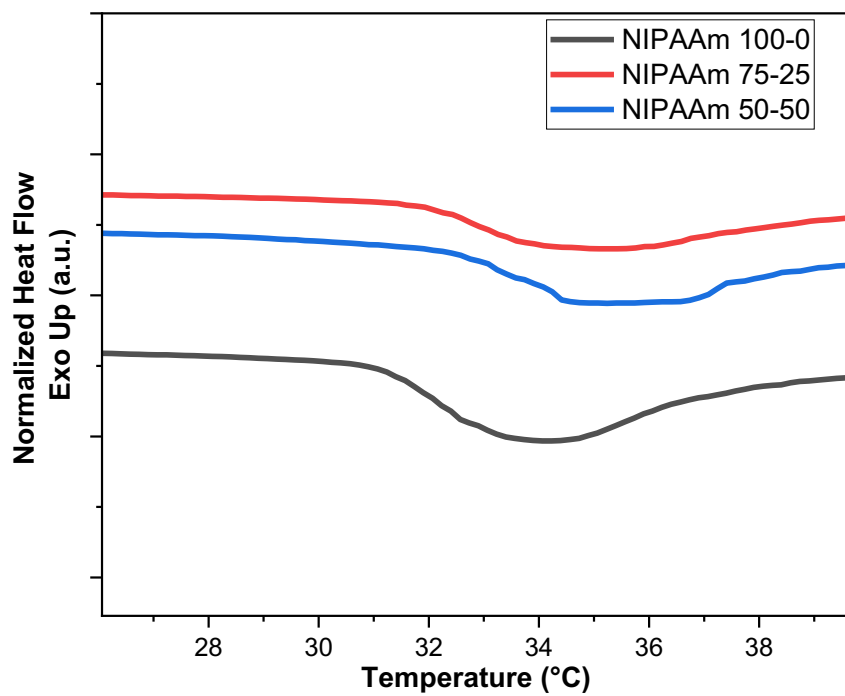

**Figure S7.** Representative DSC heating first trace of pNIPAAm hydrogels (100-0, 75-25 and 50-50 ethanol-water). Curves are shifted vertically to individually represent each curve. Each tick mark on the normalized heat flow (y-axis) represents a  $0.15 \text{ W g}^{-1}$  increment.

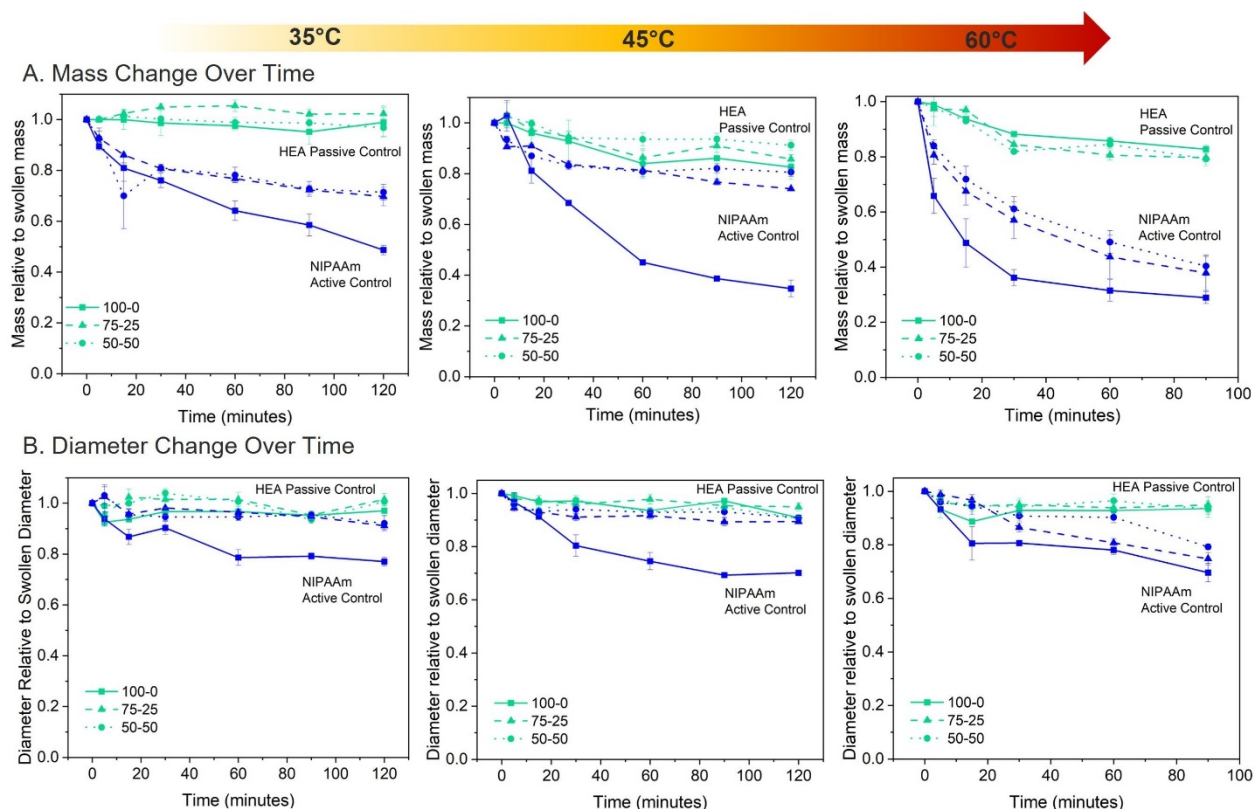

**Figure S8.** A. Ratio of measured mass of cylindrical hydrogels to equilibrium swollen mass during heating in a water bath at 35, 45, and 60 °C. B. Ratio of measured diameter of cylindrical hydrogels to equilibrium swollen diameter during heating in a water bath at 35, 45, and 60 °C. Solid lines connect data points from NIPAAm and HEA 100-0 hydrogels, dashed lines connect data points from NIPAAm and HEA 75-25 hydrogels, and dotted lines connect data points from NIPAAm and HEA 50-50 hydrogels.

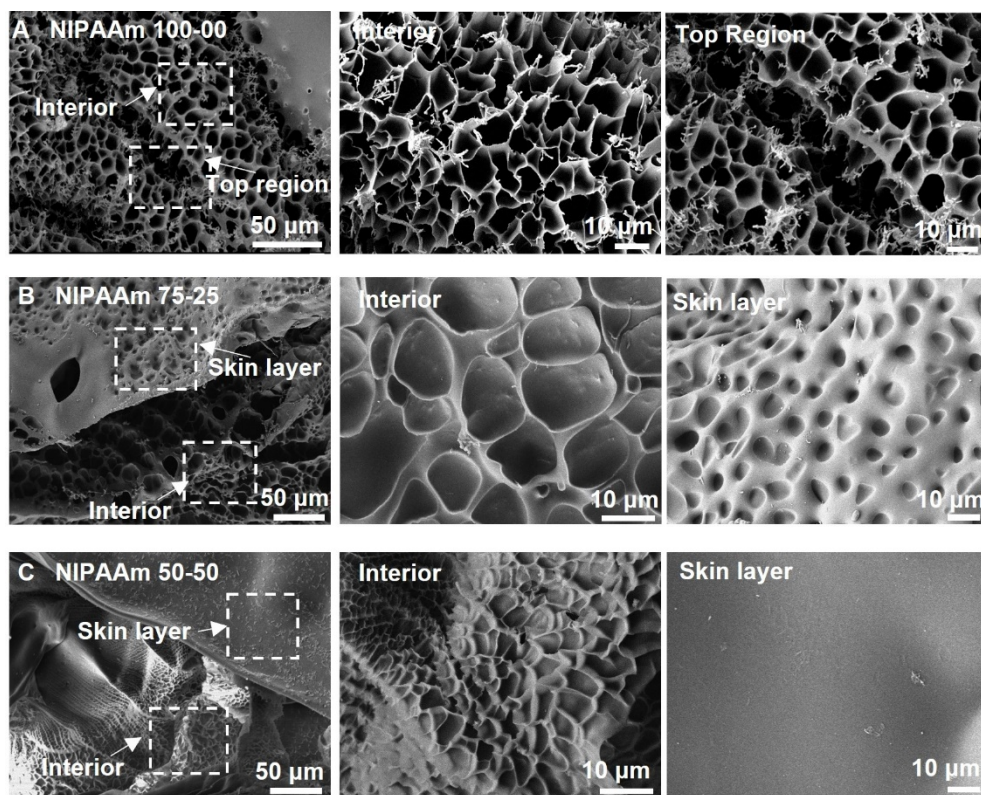

**Figure S9.** SEM micrographs of NIPAAm 100-0, NIPAAm 75-25, and NIPAAm 50-50 hydrogels after exposure to 60 °C water for 30 min. A. Left: Zoomed-out SEM micrograph of the NIPAAm 100-0 hydrogel after exposure to 60 °C for 30 min, with dotted inset boxes denoting the top layer and interior having porous structure. Middle: Zoomed-in view of the porous interior layer indicated in the zoomed-out view on the left-side SEM micrograph, and Right: zoomed-in image of the exterior top layer of the NIPAAm 100-0 hydrogel. B. Left: Zoomed-out SEM micrograph of the NIPAAm 75-25 hydrogel after exposure to 60 °C water for 30 min with inset, dotted boxes denoting the location of the skin layer on the exterior and the porous layer in the interior; Middle: Zoomed-in view of the porous interior indicated in the zoomed-out view on the left-side SEM micrograph, and Right: Zoomed-in view of the skin layer shown in the zoomed-out view on the left-side SEM micrograph. C. Left: Zoomed-out SEM micrograph of the NIPAAm 50-50 hydrogel after exposure to 60 °C for 30 min, with dotted inset boxes denoting the skin layer on the exterior

and the porous layer in the interior, Middle: Zoomed-in view of the porous interior layer indicated in the zoomed-out view on the left-side SEM micrograph, and Right: zoomed-in image of the exterior skin layer of NIPAAm 50-50 hydrogel.

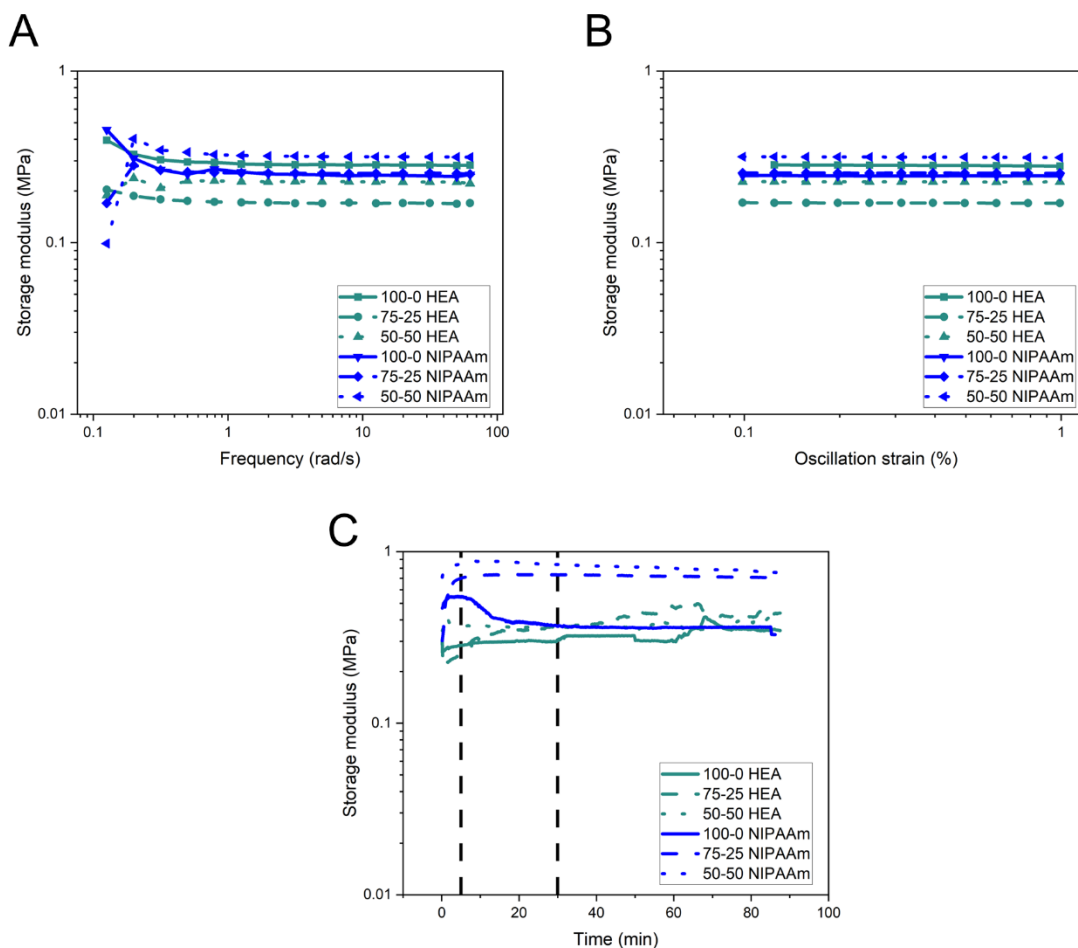

**Figure S10.** Immersion DMA plots of pNIPAAm and pHEA hydrogels (100-0, 75-25 and 50-50 ethanol-water). A. Frequency sweep, B. Oscillation strain sweep, and C. Isothermal time sweep at 60°C over 90 min. The dotted line at 5 min represents the first measured point of contraction in **Figure S8** and the dotted line at 30 min represents the time corresponding to the data in **Figure 3**.



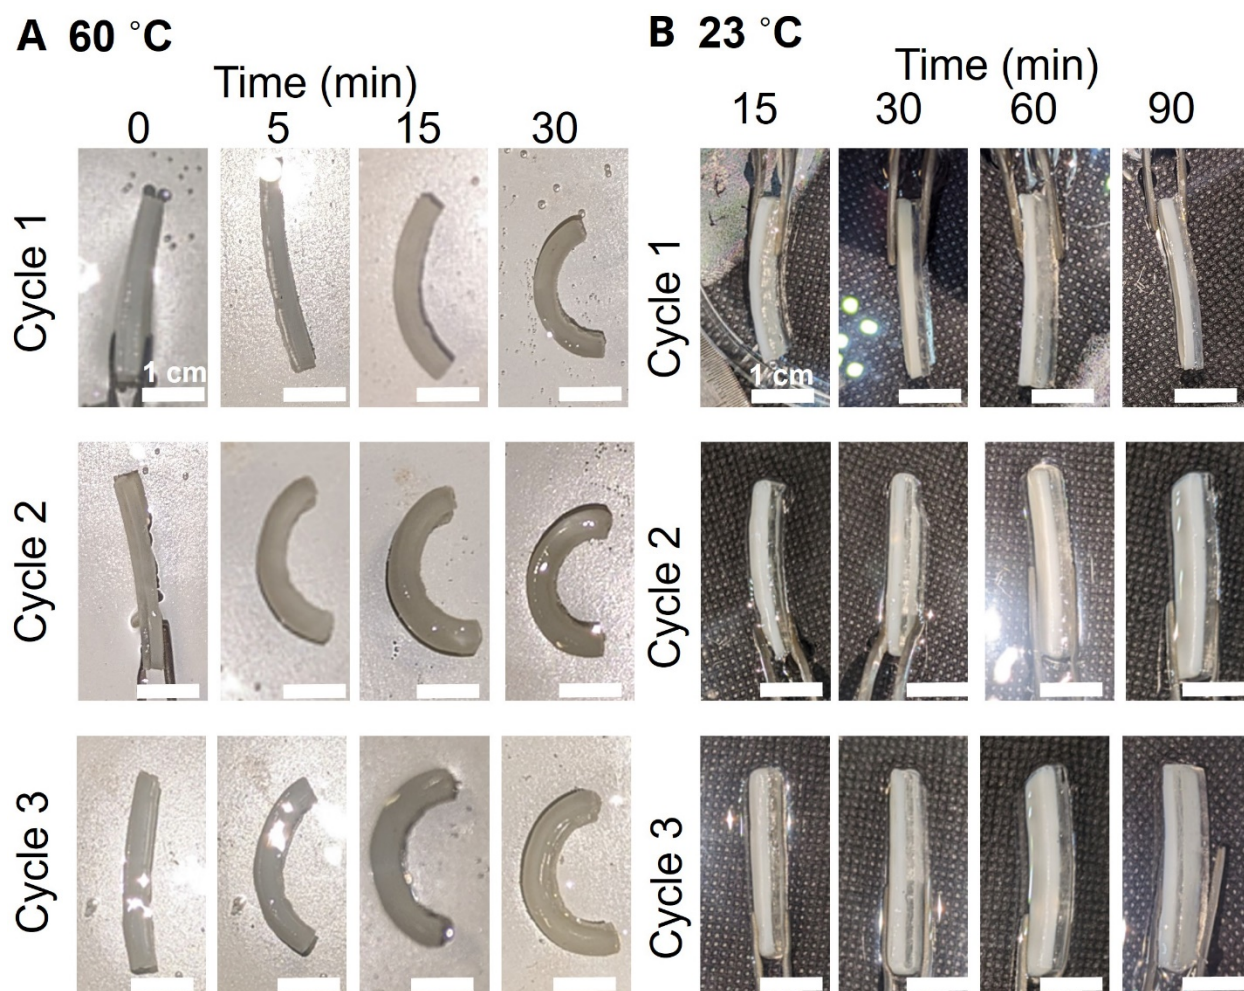

**Figure S11.** Reversible thermal actuation of a 50-50 bilayer hydrogel over 30 min. Photographs of A. Left to Right: 50-50 bilayer hydrogel immersed in 60 °C water at specific time intervals of 0, 5, 15 and 30 minutes and B. Left to Right: The same bilayer hydrogel removed from 60 °C water and immersed in room temperature (~25 °C) water at specific time intervals of 15, 30, 60, and 90 minutes. All scale bars in A and B are 1 cm.

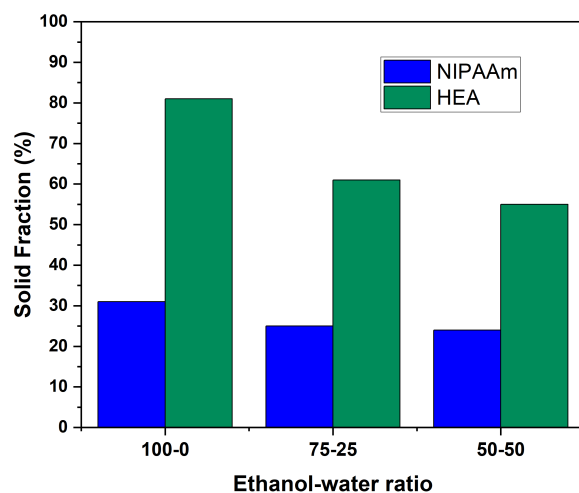

**Figure S12.** Comparison of solid fraction of pNIPAAm and pHEA hydrogels. The solid fraction was calculated by thresholding the SEM images in **Figure 2** using ImageJ.

## References

- 1 S. L. M. Alexander and L. T. J. Korley, *Soft Matter*, 2017, **13**, 283–291.
- 2 M. Rubinstein and R. H. Colby, *Polymer Physics*, Oxford University Press, 23rd Ed., 2003.
- 3 S. Timoshenko, *J. Opt. Soc. Am.*, 1925, **11**, 233.
- 4 M. M. Fares and A. A. Othman, *J. Appl. Polym. Sci.*, 2008, **110**, 2815–2825.
- 5 J. B. Hou, X. Q. Zhang, D. Wu, J. F. Feng, D. Ke, B. J. Li and S. Zhang, *ACS Appl. Mater. Interfaces*, 2019, **11**, 12105–12113.
